# Supplementary material
Source: ML conference proceedings conference paper supplement (https://openreview.net/forum?id=8n0eirHTH7I)
Supplement: supplementary_material [file attachment]

## Checklist

1. For all authors...
  - (a) Do the main claims made in the abstract and introduction accurately reflect the paper's contributions and scope? [Yes]
  - (b) Did you describe the limitations of your work? [N/A]
  - (c) Did you discuss any potential negative societal impacts of your work? [N/A]
  - (d) Have you read the ethics review guidelines and ensured that your paper conforms to them? [Yes]
2. If you are including theoretical results...
  - (a) Did you state the full set of assumptions of all theoretical results? [Yes] See Section 2
  - (b) Did you include complete proofs of all theoretical results? [Yes] See Appendix for complete proofs
3. If you ran experiments...
  - (a) Did you include the code, data, and instructions needed to reproduce the main experimental results (either in the supplemental material or as a URL)? [N/A]
  - (b) Did you specify all the training details (e.g., data splits, hyperparameters, how they were chosen)? [N/A]
  - (c) Did you report error bars (e.g., with respect to the random seed after running experiments multiple times)? [N/A]
  - (d) Did you include the total amount of compute and the type of resources used (e.g., type of GPUs, internal cluster, or cloud provider)? [N/A]
4. If you are using existing assets (e.g., code, data, models) or curating/releasing new assets...
  - (a) If your work uses existing assets, did you cite the creators? [N/A]
  - (b) Did you mention the license of the assets? [N/A]
  - (c) Did you include any new assets either in the supplemental material or as a URL? [N/A]
  - (d) Did you discuss whether and how consent was obtained from people whose data you're using/curating? [N/A]
  - (e) Did you discuss whether the data you are using/curating contains personally identifiable information or offensive content? [N/A]
5. If you used crowdsourcing or conducted research with human subjects...
  - (a) Did you include the full text of instructions given to participants and screenshots, if applicable? [N/A]
  - (b) Did you describe any potential participant risks, with links to Institutional Review Board (IRB) approvals, if applicable? [N/A]
  - (c) Did you include the estimated hourly wage paid to participants and the total amount spent on participant compensation? [N/A]

## A Algorithm for General-Self-Concordant Functions

In this section we will show how to use our algorithms for the following classes of general-self-concordant functions.

1.  $6 > \nu \geq 2$ :  $\mathbf{f}$  is  $(N, \nu)$ -g.s.c. and  $L$ -smooth.
2.  $\nu < 2$ :  $\mathbf{f}$  is  $(N, \nu)$ -g.s.c.,  $L$ -smooth and  $\mu$ -strongly convex.

We will use the following result to reduce these problems to  $(M, 2)$ -g.s.c. problems and use our algorithms.

**Lemma A.1** (Prop 4. [STD19](#)). *Let  $\mathbf{f}$  be  $(M, \nu)$ -g.s.c. with  $\nu > 0$ . Then:*

- (a) *If  $\nu \in (0, 3]$  and  $\mathbf{f}$  is also strongly convex with strong convexity parameter  $\mu > 0$  in  $\ell_2$ -norm, then  $\mathbf{f}$  is also  $\left(\frac{M}{\sqrt{\mu}^{3-\nu}}, 3\right)$ -g.s.c.*
- (b) *If  $\nu \geq 2$  and  $\nabla \mathbf{f}$  is Lipschitz continuous with finite Lipschitz constant  $L$  in  $\ell_2$ -norm, then  $\mathbf{f}$  is also  $(ML^{\frac{\nu}{2}-1}, 2)$ -g.s.c.*

We thus have the following result.

**Theorem A.2.** *For  $\delta > 0$ ,  $\mathbf{f}$   $(N, \nu)$ -g.s.c.  $6 > \nu \geq 2$  and  $L$ -smooth, let  $\bar{\mathbf{x}}$  be the solution returned by Algorithm [1](#) (with  $\epsilon = 1$ ) applied to  $\mathbf{f}(\mathbf{x})$ . Now, Algorithm [2](#) with starting solution  $\mathbf{x}^{(0)} = \bar{\mathbf{x}}$ , applied to  $\mathbf{f}$  finds  $\tilde{\mathbf{x}}$  such that  $\mathbf{A}\tilde{\mathbf{x}} = \mathbf{b}$  and  $\sum_i \mathbf{f}(\mathbf{P}\tilde{\mathbf{x}}_i) \leq \sum_i \mathbf{f}(\mathbf{P}\mathbf{x}_i^*) + \delta$  in at most*

$$O\left(m^{1/3}NL^{\frac{\nu-2}{2}}R\log\left(\frac{\mathbf{f}(\mathbf{x}^{(0)}) - \mathbf{f}(\mathbf{x}^*)}{\delta}\right)\right)$$

*calls to a linear system solver.*

*Proof.* From Lemma [A.1](#),  $\mathbf{f}$  is  $(NL^{(\nu-2)/2}, 2)$ -g.s.c. We now use Lemma [3.3](#) with  $M = NL^{(\nu-2)/2}$  followed by Theorem [4.6](#).  $\square$

**Theorem A.3.** *For  $\delta > 0$ ,  $\mathbf{f}$   $(N, \nu)$ -g.s.c.  $2 > \nu \geq 0$  and  $L$ -smooth  $\mu$ -strongly convex, let  $\bar{\mathbf{x}}$  be the solution returned by Algorithm [1](#) (with  $\epsilon = 1$ ) applied to  $\mathbf{f}(\mathbf{x})$ . Now, Algorithm [2](#) with starting solution  $\mathbf{x}^{(0)} = \bar{\mathbf{x}}$ , applied to  $\mathbf{f}$  finds  $\tilde{\mathbf{x}}$  such that  $\mathbf{A}\tilde{\mathbf{x}} = \mathbf{b}$  and  $\sum_i \mathbf{f}(\mathbf{P}\tilde{\mathbf{x}}_i) \leq \sum_i \mathbf{f}(\mathbf{P}\mathbf{x}_i^*) + \delta$  in at most*

$$O\left(m^{1/3}N\mu^{-\frac{3-\nu}{2}}L^{1/2}R\log\left(\frac{\mathbf{f}(\mathbf{x}^{(0)}) - \mathbf{f}(\mathbf{x}^*)}{\delta}\right)\right)$$

*calls to a linear system solver.*

*Proof.* From Lemma [A.1](#),  $\mathbf{f}$  is  $(N\mu^{-\frac{3-\nu}{2}}L^{1/2}, 2)$ -g.s.c. We now use Lemma [3.3](#) with  $M = N\mu^{-\frac{3-\nu}{2}}L^{1/2}$  followed by Theorem [4.6](#).  $\square$

## B Missing Proofs

### B.1 Proofs from Section [2](#)

**Definition B.1.** [Hessian Stability] *For distance  $r \in \mathbb{R}_{\geq 0}$  and function  $\mathbf{d} : \mathbb{R}_{\geq 0} \rightarrow \mathbb{R}_{\geq 0}$  acting on  $r$ , a function  $\mathbf{f}$  is  $(r, \mathbf{d}(r))$ -hessian stable w.r.t. a norm  $\|\cdot\|$  if for all  $\mathbf{x}, \mathbf{y}$  such that  $\|\mathbf{x} - \mathbf{y}\| \leq r$ ,*

$$\frac{1}{\mathbf{d}(r)}\nabla^2\mathbf{f}(\mathbf{x}) \preceq \nabla^2\mathbf{f}(\mathbf{y}) \preceq \mathbf{d}(r)\nabla^2\mathbf{f}(\mathbf{x})$$

**Lemma B.2** (Lemma 11 [CJJ+20](#)). *If  $\mathbf{f}$  is a univariate  $M$ -quasi-self-concordant (q.s.c.) function, then  $\mathbf{f}(\mathbf{x}) = \sum_i \mathbf{f}(\mathbf{x}_i)$  is  $(r, e^{Mr})$  hessian stable in the  $\ell_\infty$ -norm.*

**Lemma 2.4.** For  $\epsilon > 0$ , resistances  $\mathbf{r}$  (Definition 2.3), with corresponding weights  $\mathbf{w}$ , we have

$$\Psi(\mathbf{r}) \leq (1 + \epsilon)\Phi(\mathbf{w}).$$

In addition, letting  $\|\mathbf{P}\|_{\min} = \min_{\mathbf{A}\mathbf{x}=\mathbf{b}} \|\mathbf{P}\mathbf{x}\|_2$  and  $\|\mathbf{A}\|$  denote the operator norm of  $\mathbf{A}$ , we have

$$\Psi(\mathbf{r}) \geq \frac{\epsilon\Phi(\mathbf{w})}{mR^2} \frac{\|\mathbf{P}\|_{\min}^2 \|\mathbf{b}\|_2^2}{\|\mathbf{A}\|^2} \stackrel{\text{def}}{=} \Phi(\mathbf{w})L.$$

*Proof.* Let  $\tilde{\Delta}$  be the minimizer of  $\Psi(\mathbf{r})$  and  $\mathbf{x}^*$  be the optimum of (1).

$$\begin{aligned} \Psi(\mathbf{r}) &= \sum_i r_i (\mathbf{P}\tilde{\Delta})_i^2 \leq \sum_i r_i (\mathbf{P}\mathbf{x}^*)_i^2 \\ &= \sum_i \left( \mathbf{f}''(\mathbf{w}_i) + \frac{\epsilon\Phi(\mathbf{w})}{m} \right) \frac{(\mathbf{P}\mathbf{x}^*)_i^2}{R^2} \\ &\leq \sum_i \mathbf{f}''(\mathbf{w}_i) + \frac{\epsilon\Phi(\mathbf{w})}{m} \cdot m, && \text{Since } \|\mathbf{P}\mathbf{x}^*\|_\infty \leq R \\ &= \Phi(\mathbf{w})(1 + \epsilon) \end{aligned}$$

We next look at a lower bound for  $\Psi$ . We note that, any solution to the oracle must satisfy  $\mathbf{A}\tilde{\Delta} = \mathbf{b}$ . This implies,  $\|\mathbf{A}\|\|\tilde{\Delta}\|_2 \geq \|\mathbf{b}\|_2$ , where  $\|\cdot\|$  denotes the operator norm. Now,

$$\Psi(\mathbf{r}) \geq \frac{\epsilon\Phi(\mathbf{w})}{mR^2} \|\mathbf{P}\tilde{\Delta}\|_2^2 \geq \frac{\epsilon\Phi(\mathbf{w})}{mR^2} \|\mathbf{P}\|_{\min}^2 \|\tilde{\Delta}\|_2^2 \geq \frac{\epsilon\Phi(\mathbf{w})}{mR^2} \frac{\|\mathbf{P}\|_{\min}^2 \|\mathbf{b}\|_2^2}{\|\mathbf{A}\|^2}.$$

□

**Lemma B.3.**

$$\sum_i \mathbf{f}''(\mathbf{w}_i) |\mathbf{P}\tilde{\Delta}|_i \leq (1 + \epsilon)R\Phi(\mathbf{w})$$

*Proof.*

$$\begin{aligned} \sum_i \mathbf{f}''(\mathbf{w}_i) |\mathbf{P}\tilde{\Delta}|_i &\leq \sqrt{\sum_i \mathbf{f}''(\mathbf{w}_i) \sum_i \mathbf{f}''(\mathbf{w}_i) |\mathbf{P}\tilde{\Delta}|_i^2} && \text{Cauchy Schwarz} \\ &\leq \sqrt{\Phi(\mathbf{w})} \sqrt{R^2 \Psi(\mathbf{r})} \\ &\leq R \sqrt{\Phi(\mathbf{w})} \sqrt{(1 + \epsilon)\Phi(\mathbf{w})} && \text{From Lemma 2.4} \\ &= R(1 + \epsilon)\Phi(\mathbf{w}). \end{aligned}$$

□

## B.2 Proofs from Section 3

### Change in $\Psi$

**Lemma 3.1.** Let  $\Psi$  be as defined in 2.3. After  $t$  flow steps and  $k$  width reduction steps, we have,

$$\begin{aligned} \Psi(\mathbf{r}^{(t,k)}) &\geq \Psi(\mathbf{r}^{(0,0)}) \left( 1 + \frac{\epsilon^2 \tau^2}{(1 + \epsilon)^2 m} \right)^k && \text{if } \mathbf{f}'' \text{ non-decreasing in } \mathbf{w}, \\ \Psi(\mathbf{r}^{(t,k)}) &\leq \Psi(\mathbf{r}^{(0,0)}) \left( 1 - \frac{\epsilon^2 \tau^2}{2(1 + \epsilon)^2 m} \right)^k && \text{if } \mathbf{f}'' \text{ non-increasing in } \mathbf{w}. \end{aligned}$$

*Proof.* We show this by induction. It is clear that this holds for  $t = k = 0$ . We know from Lemma C.2 for  $\mathbf{r}' \geq \mathbf{r}$ ,

$$\Psi(\mathbf{r}') \geq \Psi(\mathbf{r}) + \sum_i \left( 1 - \frac{\mathbf{r}'_i}{\mathbf{r}_i} \right) r_i (\mathbf{P}\tilde{\Delta})_i^2.$$

Since the weights are only increasing, this corresponds to the case  $f''$  is an increasing function. Similarly, when  $f''$  is a non-increasing function, we have the following bound: for  $r' \leq r$  from Lemma [C.1](#)

$$\Psi(r') \leq \Psi(r) - \frac{1}{2} \sum_i \left(1 - \frac{r'_i}{r_i}\right) r_i (P\tilde{\Delta})_i^2.$$

We first consider a flow step. We note that our weights  $w$  are increasing, and if  $f''$  is increasing then  $r^{(t+1)} \geq r^{(t)}$ . Similarly if  $f''$  is decreasing,  $r^{(t+1,k)} \leq r^{(t,k)}$ . We can use the above relations to now get  $\Psi(r^{(t+1,k)}) \geq \Psi(r^{(t,k)})$  for the first case and  $\Psi(r^{(t+1,k)}) \leq \Psi(r^{(t,k)})$  for the second. We next consider a width reduction step. Let  $i$  be one edge that has  $|P\tilde{\Delta}_i| \geq R\tau$ . We have,

$$r_i^{(t,k)} (P\tilde{\Delta})_i^2 \geq \frac{\epsilon \Phi(w^{(t,k)})}{R^2 m} |P\tilde{\Delta}_i|^2 \geq \frac{\epsilon \Phi(w^{(t,k)})}{R^2 m} R^2 \tau^2 \geq \frac{\epsilon \tau^2}{(1+\epsilon)m} \Psi(r^{(t,k)}),$$

where the last inequality follows from Lemma [2.4](#). Now, since we are changing our resistances by a factor of  $(1+\epsilon)$ , we get the following bounds for the two cases,

$$\Psi(r^{(t,k+1)}) \geq \Psi(r^{(t,k)}) + \left(1 - \frac{r_i}{(1+\epsilon)r_i}\right) \frac{\epsilon \tau^2}{(1+\epsilon)m} \Psi(r^{(t,k)}) = \Psi(r^{(t,k)}) \left(1 + \frac{\epsilon^2 \tau^2}{(1+\epsilon)^2 m}\right),$$

$$\Psi(r^{(t,k+1)}) \leq \Psi(r^{(t,k)}) - \frac{1}{2} \left(1 - \frac{r_i/(1+\epsilon)}{r_i}\right) \frac{\epsilon \tau^2}{(1+\epsilon)m} \Psi(r^{(t,k)}) = \Psi(r^{(t,k)}) \left(1 - \frac{\epsilon^2 \tau^2}{2(1+\epsilon)^2 m}\right).$$

With these two relations we conclude our proof.  $\square$

### Change in $\Phi$

**Lemma 3.2.** *Suppose  $f$  is  $M$ -q.s.c. Let  $\alpha$  and  $\tau$  be such that  $\alpha\tau \leq M^{-1}$ . After  $t$  flow steps and  $k$  width reduction steps, our potential  $\Phi$  satisfies*

$$\begin{aligned} \Phi(w^{(t,k)}) &\leq \left(1 + \epsilon(1+\epsilon)^2 \alpha M\right)^t \left(1 + \epsilon(1+\epsilon)\tau^{-1}\right)^k \Phi(w_0) && \text{if } f'' \text{ non-decreasing in } w, \\ \Phi(w^{(t,k)}) &\geq \left(1 - \epsilon(1+\epsilon)^2 \alpha M\right)^t \left(1 - \epsilon(1+\epsilon)\tau^{-1}\right)^k \Phi(w_0) && \text{if } f'' \text{ non-increasing in } w. \end{aligned}$$

*Proof.* We first show the case when  $f''$  is increasing. The same calculation will work for the other case too by just considering the sign of  $\Phi'$ .

We will use induction. It is easy to see the claim holds for the initial iteration,  $t = k = 0$ . We next assume that it holds for some  $w^{(t,k)}$ . If the next step is a flow step, we update to  $w^{(t+1,k)} \leq w^{(t,k)} + \epsilon\alpha\tau$ . Since  $\alpha\tau \leq M^{-1}$ , we have that  $\Phi$  is  $(M^{-1}, \epsilon^\epsilon)$  hessian stable around this update. We will use  $w$  to denote  $w^{(t,k)}$  for simplicity. We thus have,

$$\begin{aligned} \Phi(w^{(t+1)}) &= \Phi\left(w + \frac{\epsilon\alpha}{R} |P\tilde{\Delta}|\right) \\ &= \Phi(w) + \frac{\epsilon\alpha}{R} \nabla\Phi(y)^\top |P\tilde{\Delta}| \\ &\quad \text{(For some } y \text{ between } w \text{ and } w + \alpha|P\Delta|) \\ &= \Phi(w) + \frac{\epsilon\alpha}{R} \sum_i f'''(y_i) |P\tilde{\Delta}_i| \\ &\leq \Phi(w) + \frac{\epsilon\alpha}{R} M \sum_i f''(y_i) |P\tilde{\Delta}_i| \\ &\quad \text{(Since } f \text{ is } M\text{-q.s.c.)} \\ &\leq \Phi(w) + \frac{\epsilon\alpha}{R} M e^\epsilon \sum_i f''(w_i) |P\tilde{\Delta}_i| \\ &\quad \text{(Since } f \text{ is hessian stable in this range)} \\ &\leq \Phi(w) + \epsilon(1+\epsilon)^2 \alpha M \Phi(w) \\ &\quad \text{(From Lemma [B.3](#))} \end{aligned}$$

We thus get the following bound,

$$\Phi(\mathbf{w}^{(t+1,k)}) \leq \Phi(\mathbf{w}^{(t,k)}) \left(1 + \epsilon(1 + \epsilon)^2 \alpha M\right).$$

Now, suppose the next step is a width reduction step.

$$\begin{aligned} \Phi(\mathbf{w}^{(t,k+1)}) &= \sum_{i \notin \mathcal{I}} \Phi(\mathbf{w}_i) + \sum_{i \in \mathcal{I}} \Phi(\mathbf{w}_i^{(t+1)}) \\ &= \sum_{i \notin \mathcal{I}} \Phi(\mathbf{w}_i) + \sum_{i \in \mathcal{I}} \mathbf{f}''(\mathbf{w}_i^{(t+1)}) \\ &\leq \sum_{i \notin \mathcal{I}} \Phi(\mathbf{w}_i) + (1 + \epsilon) \sum_{i \in \mathcal{I}} \mathbf{f}''(\mathbf{w}_i) \\ &\leq \Phi(\mathbf{w}) + \frac{\epsilon}{R\tau} \sum_{i \in \mathcal{I}} \mathbf{f}''(\mathbf{w}_i) |P\tilde{\Delta}|_i \\ &\leq \Phi(\mathbf{w}) + \frac{\epsilon}{R\tau} \sum_i \mathbf{f}''(\mathbf{w}_i) |P\tilde{\Delta}|_i \\ &\leq \Phi(\mathbf{w}) + \frac{\epsilon(1 + \epsilon)}{\tau} \Phi(\mathbf{w}) \end{aligned}$$

From Lemma [B.3](#)

We thus get the following bound,

$$\Phi(\mathbf{w}^{(t,k+1)}) \leq \Phi(\mathbf{w}^{(t,k)}) \left(1 + \epsilon(1 + \epsilon)\tau^{-1}\right).$$

□

### B.3 Proofs from Section [4](#)

#### Iterative Refinement

**Lemma B.4.** *Let  $\mathbf{f}$  be a  $(r, d(r))$ -hessian stable function in  $\ell_\infty$ -norm, and  $\tilde{\mathbf{x}} = \mathbf{x} + \Delta$  such that  $\|\Delta\|_\infty \leq r$ . We then have,*

$$\frac{1}{d(r)} \Delta^\top \nabla^2 \mathbf{f}(\mathbf{x}) \Delta \leq \mathbf{f}(\tilde{\mathbf{x}}) - \mathbf{f}(\mathbf{x}) - \nabla \mathbf{f}(\mathbf{x})^\top \Delta \leq d(r) \Delta^\top \nabla^2 \mathbf{f}(\mathbf{x}) \Delta,$$

*Proof.* We have for some  $\mathbf{z}$  along the line joining  $\mathbf{x}$  and  $\tilde{\mathbf{x}}$ ,

$$\mathbf{f}(\tilde{\mathbf{x}}) = \mathbf{f}(\mathbf{x}) + \nabla \mathbf{f}(\mathbf{x})^\top \Delta + \Delta^\top \nabla^2 \mathbf{f}(\mathbf{z}) \Delta.$$

Since  $\|\mathbf{z} - \mathbf{x}\|_\infty \leq \|\tilde{\mathbf{x}} - \mathbf{x}\|_\infty \leq r$ , from hessian stability, we have,

$$\frac{1}{d(r)} \nabla^2 \mathbf{f}(\mathbf{x}) \preceq \nabla^2 \mathbf{f}(\mathbf{z}) \preceq d(r) \nabla^2 \mathbf{f}(\mathbf{x}).$$

Using this relation in the above, we get our lemma. □

**Lemma B.5.** *Let  $\Delta$  be any feasible solution to the residual problem at  $\mathbf{x}$ . We then have,*

$$\mathbf{f}(\mathbf{x}) - \mathbf{f}(\mathbf{x} - \Delta) \leq \text{res}(\Delta), \quad \mathbf{f}(\mathbf{x}) - \mathbf{f}(\mathbf{x} - e^{-2}\Delta) \geq e^{-2} \cdot \text{res}(\Delta),$$

*Proof.* Since our function is  $M$ -q.s.c., from Lemmas [B.4](#) and [B.2](#) for all  $\Delta$  such that  $\|P\Delta\|_\infty \leq M^{-1}$ ,

$$e^{-1}(P\Delta)^\top \nabla^2 \mathbf{f}(\mathbf{x}) P\Delta \leq \mathbf{f}(\mathbf{x} - \Delta) - \mathbf{f}(\mathbf{x}) + \nabla \mathbf{f}(\mathbf{x})^\top P\Delta \leq e(P\Delta)^\top \nabla^2 \mathbf{f}(\mathbf{x}) P\Delta.$$

The first bound directly follows from the left inequality. For the second bound, we first note that  $e^{-2}\|\mathbf{P}\Delta\| \leq M^{-1}$ . We can now use the right inequality.

$$\begin{aligned} \mathbf{f}(\mathbf{x}) - \mathbf{f}(\mathbf{x} - e^{-2}\Delta) &\geq e^{-2}\nabla\mathbf{f}(\mathbf{x})^\top\mathbf{P}\Delta - e^{-3}(\mathbf{P}\Delta)^\top\nabla^2\mathbf{f}(\mathbf{x})\mathbf{P}\Delta \\ &= e^{-2}\left(\nabla\mathbf{f}(\mathbf{x})^\top\mathbf{P}\Delta - e^{-1}(\mathbf{P}\Delta)^\top\nabla^2\mathbf{f}(\mathbf{x})\mathbf{P}\Delta\right) \\ &= e^{-2}\text{res}(\Delta). \end{aligned}$$

□

**Lemma B.6.** Assume  $\mathbf{f}$  is  $M$ -q.s.c. Let  $\mathbf{x}^*$  denote the minimizer of Problem (1) and  $\Delta^*$  the optimizer of Problem (3) at  $\mathbf{x}^{(t)}$ . We then have,

$$\text{res}(\Delta^*) \geq \frac{1}{4MR} \left( \mathbf{f}(\mathbf{x}^{(t)}) - \mathbf{f}(\mathbf{x}^*) \right).$$

*Proof.* Let  $\mathbf{x}^{(t)}$  be such that  $\mathbf{A}\mathbf{x}^{(t)} = \mathbf{b}$  and  $\mathbf{x}^*$  is the optimum of (1). Note that we have  $\|\mathbf{P}\mathbf{x}^{(t)}\|_\infty \leq R$  and therefore,  $\|\mathbf{P}\mathbf{x}^{(t)} - \mathbf{P}\mathbf{x}^*\|_\infty \leq 2R$ . Let  $r = \frac{1}{2M}$  and  $\mathbf{x} = \left(1 - \frac{r}{2R}\right)\mathbf{x}^{(t)} + \frac{r}{2R}\mathbf{x}^*$ . Let  $\tilde{\Delta} = \mathbf{x}^{(t)} - \mathbf{x} = \frac{r}{2R}(\mathbf{x}^{(t)} - \mathbf{x}^*)$ . We have,

$$\|\mathbf{P}\tilde{\Delta}\|_\infty = \|\mathbf{P}\mathbf{x}^{(t)} - \mathbf{P}\mathbf{x}\|_\infty = \frac{r}{2R}\|\mathbf{P}\mathbf{x}^{(t)} - \mathbf{P}\mathbf{x}^*\|_\infty \leq r,$$

and

$$\mathbf{A}\tilde{\Delta} = \mathbf{A}(\mathbf{x}^{(t)} - \mathbf{x}) = \frac{r}{2R}(-\mathbf{A}\mathbf{x}^* + \mathbf{A}\mathbf{x}^{(t)}) = 0.$$

We next show that  $\|\mathbf{P}\tilde{\Delta} - \mathbf{z}\|_\infty \leq \frac{1}{2M}$ .

$$\|\mathbf{P}\tilde{\Delta} - \mathbf{z}\|_\infty = \left\| \frac{r}{2R}\mathbf{P}\mathbf{x}^{(t)} - \frac{r}{2R}\mathbf{P}\mathbf{x}^* - \mathbf{z} \right\|_\infty$$

We will do a case by case analysis. Consider some coordinate  $i$ .

1.  $\mathbf{P}\mathbf{x}_i^{(t)} - \frac{1}{2M} < -R$ : From the definition of  $\mathbf{z}_i$ , we note that  $\mathbf{z}_i = R - \frac{1}{2M} + \mathbf{P}\mathbf{x}_i^{(t)}$  and  $-R < \mathbf{P}\mathbf{x}_i^{(t)} \leq -R + \frac{1}{2M}$ . Suppose  $\mathbf{P}\mathbf{x}_i^{(t)} = -R + a$  for some  $0 \leq a < \frac{1}{2M}$ . We have,

$$\begin{aligned} \left| \mathbf{P}\tilde{\Delta} - \mathbf{z} \right|_i &= \left| \frac{r}{2R}(\mathbf{P}\mathbf{x}_i^{(t)} - \mathbf{P}\mathbf{x}_i^*) - \mathbf{z}_i \right| \\ &= \left| \frac{r}{2R}(-R + a - \mathbf{P}\mathbf{x}_i^*) - a + \frac{1}{2M} \right| \\ &= \left| \frac{r}{2R}(-R - \mathbf{P}\mathbf{x}_i^*) - a \left(1 - \frac{r}{2R}\right) + \frac{1}{2M} \right| \\ &\leq \frac{1}{2M}. \end{aligned}$$

The last inequality follows since  $-2R \leq -R - \mathbf{P}\mathbf{x}_i^* \leq 0$ .

2.  $\mathbf{P}\mathbf{x}_i^{(t)} + \frac{1}{2M} > R$ : From the definition of  $\mathbf{z}_i$ , we note that  $\mathbf{z}_i = -R + \frac{1}{2M} + \mathbf{P}\mathbf{x}_i^{(t)}$  and  $R - \frac{1}{2M} < \mathbf{P}\mathbf{x}_i^{(t)} \leq R$ . Suppose  $\mathbf{P}\mathbf{x}_i^{(t)} = R - a$  for some  $0 \leq a < \frac{1}{2M}$ . We have,

$$\begin{aligned} \left| \mathbf{P}\tilde{\Delta} - \mathbf{z} \right|_i &= \left| \frac{r}{2R}(\mathbf{P}\mathbf{x}_i^{(t)} - \mathbf{P}\mathbf{x}_i^*) - \mathbf{z}_i \right| \\ &= \left| \frac{r}{2R}(R - a - \mathbf{P}\mathbf{x}_i^*) + a - \frac{1}{2M} \right| \\ &= \left| \frac{r}{2R}(R - \mathbf{P}\mathbf{x}_i^*) + a \left(1 - \frac{r}{2R}\right) - \frac{1}{2M} \right| \\ &\leq \frac{1}{2M}. \end{aligned}$$

The last inequality follows since  $0 \leq R - \mathbf{P}\mathbf{x}_i^* \leq 2R$ .

3.  $-R + \frac{1}{2M} \leq \mathbf{P}\mathbf{x}_i^{(t)} \leq -\frac{1}{2M}R$ : In this case  $z_i = 0$ .

$$\left| \mathbf{P}\tilde{\Delta} - \mathbf{z} \right|_i = \left| \frac{r}{2R} (\mathbf{P}\mathbf{x}_i^{(t)} - \mathbf{P}\mathbf{x}_i^*) \right| \leq r = \frac{1}{2M}.$$

We thus conclude, that  $\mathbf{x} - \mathbf{x}^{(t)}$  is a feasible solution for the residual problem and from convexity,

$$\frac{r}{2R} (\mathbf{f}(\mathbf{x}^{(t)}) - \mathbf{f}(\mathbf{x}^*)) \leq \mathbf{f}(\mathbf{x}^{(t)}) - \mathbf{f}(\mathbf{x}).$$

Let  $\Delta^*$  denote the optimum of the residual problem at  $\mathbf{x}^{(t)}$  [\[3\]](#). From Lemma [B.5](#)

$$\frac{r}{2R} (\mathbf{f}(\mathbf{x}^{(t)}) - \mathbf{f}(\mathbf{x}^*)) \leq \mathbf{f}(\mathbf{x}^{(t)}) - \mathbf{f}(\mathbf{x}) \leq \text{res}(\mathbf{x}^{(t)} - \mathbf{x}) \leq \text{res}(\Delta^*).$$

□

**Lemma 4.2.** [Iterative Refinement] Let  $\mathbf{f}$  be  $M$ -q.s.c. and  $\tilde{\Delta}^{(t)}$  a  $\kappa$ -approximate solution to the residual problem at  $\mathbf{x}^{(t)}$  (Problem [\[3\]](#)). Starting from  $\mathbf{x}^{(0)}$  such that  $\mathbf{A}\mathbf{x}^{(0)} = \mathbf{b}$ ,  $\|\mathbf{x}^{(0)}\|_\infty \leq R$ , and iterating as  $\mathbf{x}^{(t+1)} = \mathbf{x}^{(t)} - e^{-2}\tilde{\Delta}^{(t)}$ , after at most  $O\left(\kappa MR \log\left(\frac{\mathbf{f}(\mathbf{x}^{(0)}) - \mathbf{f}(\mathbf{x}^*)}{\epsilon}\right)\right)$  iterations we get  $\mathbf{x}$  such that  $\mathbf{A}\mathbf{x} = \mathbf{b}$  and  $\mathbf{f}(\mathbf{x}) \leq \mathbf{f}(\mathbf{x}^*) + \epsilon$ .

*Proof.* From Lemma [B.6](#),

$$\text{res}(\tilde{\Delta}^{(t)}) \geq \frac{1}{\kappa} \text{res}(\Delta^*) \geq \frac{1}{4\kappa MR} (\mathbf{f}(\mathbf{x}^{(t)}) - \mathbf{f}(\mathbf{x}^*)).$$

Now, from Lemma [B.5](#)

$$\mathbf{f}(\mathbf{x}^{(t+1)}) - \mathbf{f}(\mathbf{x}^*) \leq \mathbf{f}(\mathbf{x}^{(t)}) - \mathbf{f}(\mathbf{x}^*) - e^{-2} \text{res}(\tilde{\Delta}^{(t)}) \leq \left(1 - \frac{e^{-2}}{4\kappa MR}\right) (\mathbf{f}(\mathbf{x}^{(t)}) - \mathbf{f}(\mathbf{x}^*)).$$

Inductively applying the above equation,

$$\mathbf{f}(\mathbf{x}^{(T)}) - \mathbf{f}(\mathbf{x}^*) \leq \left(1 - \frac{e^{-2}}{4\kappa MR}\right)^T (\mathbf{f}(\mathbf{x}^{(0)}) - \mathbf{f}(\mathbf{x}^*)).$$

□

## Binary Search

**Lemma 4.3.** Let  $\nu$  be such that  $\mathbf{f}(\mathbf{x}^{(t)}) - \mathbf{f}(\mathbf{x}^*) \in (\nu/2, \nu]$  and  $\Delta^*$  denote the optimum of the residual problem at  $\mathbf{x}^{(t)}$ . Then,  $\text{res}(\Delta^*) \in (\frac{\nu}{8MR}, e^2\nu]$ .

*Proof.* The lower bound follows from [B.6](#) For the upper bound, from [B.5](#)

$$\nu \geq \mathbf{f}(\mathbf{x}^{(t)}) - \mathbf{f}(\mathbf{x}^*) \geq \mathbf{f}(\mathbf{x}^{(t)}) - \mathbf{f}(\mathbf{x} - e^{-2}\Delta^*) \geq e^{-2} \text{res}(\Delta^*).$$

□

**Lemma 4.4.** Let  $\zeta$  be such that  $\text{res}(\Delta^*) \in (\zeta/2, \zeta]$  and  $\Delta^*$  the optimum of the residual problem. Then,  $(\mathbf{P}\Delta^*)^\top \nabla^2 \mathbf{f}(\mathbf{x}) \mathbf{P}\Delta^* \leq e \cdot \zeta$ .

*Proof.* Consider scaling  $\Delta^*$  by  $O(1) > \lambda > 0$ . We must have,

$$\left[ \frac{d}{d\lambda} \text{res}(\lambda\Delta^*) \right]_{\lambda=1} = 0.$$

This implies,

$$\nabla \mathbf{f}(\mathbf{x})^\top \mathbf{P}\Delta^* - 2e^{-1} (\mathbf{P}\Delta^*)^\top \nabla^2 \mathbf{f}(\mathbf{x}) \mathbf{P}\Delta^* = 0,$$

or

$$e^{-1} (\mathbf{P}\Delta^*)^\top \nabla^2 \mathbf{f}(\mathbf{x}) \mathbf{P}\Delta^* = \nabla \mathbf{f}(\mathbf{x})^\top \mathbf{P}\Delta^* - e^{-1} (\mathbf{P}\Delta^*)^\top \nabla^2 \mathbf{f}(\mathbf{x}) \mathbf{P}\Delta^* = \text{res}(\Delta^*) \leq \zeta.$$

□

## Width Reduction

**Lemma 4.5.** Let  $\zeta$  be such that  $\text{res}(\Delta^*) \in (\zeta/2, \zeta]$ . Algorithm 3 returns  $\mathbf{y}$  such that  $\mathbf{A}\mathbf{y} = 0$ ,  $\|\mathbf{P}\mathbf{y} - \mathbf{z}\|_\infty \leq \frac{1}{2M}$  and  $\text{res}(\mathbf{y}) \geq \frac{1}{400}\text{res}(\Delta^*)$  in  $O(m^{1/3})$  calls to a linear system solver.

*Proof.* This algorithm is basically an implementation of the width-reduced MWU algorithm from [CKM<sup>+</sup>11]. We will give a proof for completeness. For the purpose of this proof, we denote,

$$\Psi(\mathbf{r}) = \min_{\mathbf{A}\Delta=0, \nabla f(\mathbf{x})^\top \mathbf{P}\Delta=\zeta/2} \sum_j \left( \mathbf{f}''(\mathbf{x}_j)(\mathbf{P}\Delta)_j^2 + \sum_j 4M^2 \left( \mathbf{w}_j + \frac{\|\mathbf{w}\|_1}{m} \right) \right) (\mathbf{P}\Delta - \mathbf{z})_j^2,$$

$$\Phi(\mathbf{w}) = \|\mathbf{w}\|_1.$$

Let  $\tilde{\Delta}$  be the solution returned by  $\Psi$ . We first note that, for  $\Delta^*$  the optimum of the residual problem,

$$\begin{aligned} \Psi(\mathbf{r}) &\leq \sum_j \left( \mathbf{f}''(\mathbf{x}_j)(\mathbf{P}\Delta^*)_j^2 + \sum_j 4M^2 \left( \mathbf{w}_j + \frac{\|\mathbf{w}\|_1}{m} \right) \right) (\mathbf{P}\Delta^* - \mathbf{z})_j^2 \\ &\leq e \cdot \zeta + \sum_j 4M^2 \left( \mathbf{w}_j + \frac{\|\mathbf{w}\|_1}{m} \right) (\mathbf{P}\Delta^* - \mathbf{z})_j^2, \text{ From Lemma 4.4} \\ &\leq e \cdot \zeta + \|\mathbf{w}\|_1 + \Phi(\mathbf{w}), \text{ Since } \|\mathbf{P}\Delta^* - \mathbf{z}\|_\infty \leq \frac{1}{2M} \\ &\leq (e+2)\Phi(\mathbf{w}). \end{aligned}$$

We note that,

$$\sum_j \mathbf{w}_j (4M)(\mathbf{P}\tilde{\Delta} - \mathbf{z})_j \leq \sqrt{\sum_j \mathbf{w}_j \sum_j \mathbf{w}_j (4M)^2 (\mathbf{P}\tilde{\Delta} - \mathbf{z})_j^2} \leq \sqrt{\Phi(\mathbf{w})\Psi(\mathbf{r})} \leq \sqrt{e+2}\Phi(\mathbf{w}). \quad (4)$$

For a flow step, from the above calculation, note that,

$$\Phi(\mathbf{w}^{(t+1)}) = \sum_j \mathbf{w}_j + \frac{\alpha}{2} \sum_j \mathbf{w}_j M (\mathbf{P}\tilde{\Delta} - \mathbf{z})_j \leq \Phi(\mathbf{w}^{(t)}) + \frac{\sqrt{e+2}}{8} \alpha \Phi(\mathbf{w}^{(t)}) = \Phi(\mathbf{w}^{(t)})(1 + \alpha).$$

For a width reduction step let  $\mathcal{I}$  denote the indices which have the weights doubled,

$$\begin{aligned} \Phi(\mathbf{w}^{(t+1)}) &= \sum_{j \notin \mathcal{I}} \mathbf{w}_j^{(t)} + 2 \sum_{j \in \mathcal{I}} \mathbf{w}_j^{(t)} \leq \Phi(\mathbf{w}^{(t)}) + \frac{2}{\tau} \sum_{j \in \mathcal{I}} \mathbf{w}_j^{(t)} (2M) |\mathbf{P}\tilde{\Delta} - \mathbf{z}|_j \\ &\leq \Phi(\mathbf{w}^{(t)}) + \frac{\sqrt{e+2}}{\tau} \Phi(\mathbf{w}) \leq \Phi(\mathbf{w}^{(t)}) (1 + 3\tau^{-1}). \end{aligned}$$

We can bound the number of width reduction steps by  $O(m/\tau^2)$  similar to Lemma 3.1. We now show that our final solution has  $\|\frac{1}{T}\mathbf{P}\mathbf{y} - \mathbf{z}\|_\infty \leq \frac{1}{2M}$ . After  $T$  iterations, let  $j$  denote the index with max value in vector  $\mathbf{w}$ . For  $\alpha\tau \leq 1$ ,  $\left(1 + \frac{\alpha}{2}M|\mathbf{P}\tilde{\Delta} - \mathbf{z}|_j\right) \geq \exp\left(\frac{3}{4}\alpha M|\mathbf{P}\tilde{\Delta} - \mathbf{z}|_j\right)$ .

$$\begin{aligned} 10\zeta \geq \Phi(\mathbf{w}^T) &\geq \mathbf{w}_j^{(T)} \geq \frac{\zeta}{m} \prod_{t=1}^T \left(1 + \frac{\alpha}{2}M|\mathbf{P}\tilde{\Delta}^{(t)} - \mathbf{z}|_j\right) \\ &\geq \frac{\zeta}{m} \exp\left(\frac{3}{8}\alpha(2M) \sum_t |\mathbf{P}\tilde{\Delta}^{(t)} - \mathbf{z}|_j\right) = \frac{\zeta}{m} \exp\left(\frac{3}{8}\alpha(2M)(\mathbf{P}\mathbf{y} - T\mathbf{z})_j\right). \end{aligned}$$

We thus have for all coordinates  $j$  and  $T \geq \alpha^{-1}O(\log m)$ ,

$$\frac{|\mathbf{P}\mathbf{y} - T\mathbf{z}|_j}{T} \leq \frac{O(M^{-1} \log m)}{\alpha T} \leq \frac{1}{2M}.$$

It remains to show that  $\mathbf{y}/(100T)$  has the required value for the residual. First note that,

$$\nabla f(\mathbf{x})^\top \frac{\mathbf{y}}{100T} = \frac{1}{100T} \sum_t \nabla f(\mathbf{x})^\top \mathbf{P}\tilde{\Delta}^{(t)} = \frac{\zeta}{2 \cdot 100}.$$



We next look at the quadratic term.

$$\begin{aligned} \frac{1}{(100)^2 T^2} \sum_j \mathbf{f}''(\mathbf{x}_j) \mathbf{y}_j^2 &= \frac{1}{T^2 (100)^2} \sum_j \mathbf{f}''(\mathbf{x}_j) \left( \sum_t |\mathbf{P} \tilde{\Delta}^{(t)}|_j \right)^2 \\ &\leq \frac{1}{T^2 (100)^2} \sum_j T \sum_t \mathbf{f}''(\mathbf{x}_j) |\mathbf{P} \tilde{\Delta}^{(t)}|_j^2 = \frac{1}{T (100)^2} \sum_t \Psi(\mathbf{r}^{(t)}) \\ &\leq \frac{1}{T (100)^2} T (e+2) \Phi(\mathbf{w}^{(T)}) \leq \frac{10(e+2)}{(100)^2} \zeta. \end{aligned}$$

Choose  $c$  such that we have,

$$e^{-1} \frac{1}{(100)^2} \sum_j \mathbf{f}''(\mathbf{x}_j) \mathbf{y}_j^2 \leq \frac{\zeta}{4 \cdot 100}.$$

We thus have,

$$\text{res} \left( \frac{\mathbf{y}}{100T} \right) = \nabla \mathbf{f}(\mathbf{x})^\top \frac{\mathbf{y}}{100T} - e^{-1} \frac{1}{(100)^2 T^2} \sum_j \mathbf{f}''(\mathbf{x}_j) \mathbf{y}_j^2 \geq \frac{\zeta}{4 \cdot 100} \geq \frac{1}{400} \text{res}(\Delta^*).$$

□

#### B.4 Proofs from Section 5

##### Sum of exponential, soft-max and $\ell_\infty$ regression

**Theorem 5.2.** Let  $\mathbf{x}^*$  denote the optimum of the  $\ell_\infty$ -regression problem,  $\min_{\mathbf{A}\mathbf{x}=\mathbf{b}} \|\mathbf{P}\mathbf{x}\|_\infty$ . Algorithm 1 when applied to the function  $\mathbf{f}(\mathbf{P}\mathbf{x}) = \sum_i \left( e^{\frac{(\mathbf{P}\mathbf{x})_i}{\nu}} + e^{-\frac{(\mathbf{P}\mathbf{x})_i}{\nu}} \right)$  for  $\nu = \Omega\left(\frac{\epsilon}{\log m}\right)$ , returns  $\tilde{\mathbf{x}}$  such that  $\mathbf{A}\tilde{\mathbf{x}} = \mathbf{b}$  and

$$\|\mathbf{P}\tilde{\mathbf{x}}\|_\infty \leq (1 + \epsilon) \|\mathbf{P}\mathbf{x}^*\|_\infty,$$

in at most  $\tilde{O}(m^{1/3} \epsilon^{-5/3})$  calls to a linear system solve.

*Proof.* Let  $\mathbf{Q} = \begin{bmatrix} \mathbf{P} \\ -\mathbf{P} \end{bmatrix}$ . We note that  $\mathbf{f}(\mathbf{x}) = \sum_i e^{\frac{(\mathbf{Q}\mathbf{x})_i}{\nu}}$ . Let  $\bar{\mathbf{x}}$  denote the optimum of  $\mathbf{f}$ , which is also the optimum of  $\text{smax}_\nu(\mathbf{Q}\mathbf{x})$ . We have the following relation,

$$\forall \mathbf{x}, \|\mathbf{P}\mathbf{x}\|_\infty \leq \text{smax}_\nu(\mathbf{Q}\mathbf{x}) \leq \|\mathbf{P}\mathbf{x}\|_\infty + \nu \log m.$$

Let  $R = \|\mathbf{P}\mathbf{x}^*\|_\infty$  (we can find this up to  $\epsilon$  error using binary search), then the above relation implies  $\text{smax}_\nu(\mathbf{Q}\bar{\mathbf{x}}) \leq R(1 + \epsilon)$ . From Theorem 5.1

$$\|\mathbf{P}\tilde{\mathbf{x}}\|_\infty \leq \text{smax}_\nu(\mathbf{Q}\tilde{\mathbf{x}}) \leq R(1 + \epsilon) = \|\mathbf{P}\mathbf{x}^*\|_\infty (1 + \epsilon). \quad \square$$

**Theorem 5.3.** For  $\delta > 0$ , let  $\bar{\mathbf{x}}$  be the solution returned by Algorithm 1 (with  $\epsilon = 1$ ) applied to  $\mathbf{f}(\mathbf{P}\mathbf{x}) = \sum_i e^{\frac{(\mathbf{P}\mathbf{x})_i}{\nu}}$ . Now, Algorithm 2 with starting solution  $\mathbf{x}^{(0)} = \bar{\mathbf{x}}$ , applied to  $\mathbf{f}$  finds  $\tilde{\mathbf{x}}$  such that  $\mathbf{A}\tilde{\mathbf{x}} = \mathbf{b}$  and  $\sum_i e^{\frac{(\mathbf{P}\tilde{\mathbf{x}})_i}{\nu}} \leq (1 + \delta) \sum_i e^{\frac{(\mathbf{P}\bar{\mathbf{x}})_i}{\nu}}$  in at most  $O\left(m^{1/3} R^2 \nu^{-2} \log\left(\frac{m}{\delta}\right)\right)$  calls to a linear system solver.

*Proof.* From Lemma 3.3, Algorithm 1 returns  $\bar{\mathbf{x}}$  in  $O(m^{1/3})$  iterations such that  $\mathbf{A}\bar{\mathbf{x}} = \mathbf{b}$  and  $\|\mathbf{P}\bar{\mathbf{x}}\|_\infty \leq MR \|\mathbf{w}^{(T,K)}\|_\infty$ . Since  $\frac{1}{\nu^2} \sum_i e^{\frac{w_i^{(T,K)}}{\nu}} = \Phi(\mathbf{w}^{(T,K)}) \leq \Phi(\mathbf{w}_0) e^5$ , we have  $\|\mathbf{w}^{(T,K)}\|_\infty \leq 5\nu$ . This gives,  $\|\mathbf{P}\bar{\mathbf{x}}\|_\infty \leq 5R$ . We next bound the function value.

$$\mathbf{f}(\mathbf{P}\bar{\mathbf{x}}) = \sum_i e^{\frac{\mathbf{P}\bar{\mathbf{x}}_i}{\nu}} \leq \sum_i e^{\frac{w_i^{(T,K)} MR}{\nu}}.$$

If  $MR \leq 1$ , then  $\mathbf{f}(\mathbf{P}\bar{\mathbf{x}}) \leq \nu^2 \Phi(\mathbf{w}^{(T,K)}) \leq m$ . Otherwise,

$$\mathbf{f}(\mathbf{P}\bar{\mathbf{x}}) \leq \sum_i \left( e^{\frac{w_i^{(T,K)}}{\nu}} \right)^{MR} \leq \left( \sum_i e^{\frac{w_i^{(T,K)}}{\nu}} \right)^{MR} \leq (\nu^2 \Phi(\mathbf{w}^{(T,K)}))^{MR} \leq O(m^{MR}).$$

Now, we use Algorithm 2 Using the above calculated bounds in Theorem 4.6 we get our result. □

## $\ell_p$ -Regression

**Theorem 5.4.** For  $\delta > 0$  and  $p \geq 3$ , let  $\bar{\mathbf{x}}$  be the solution returned by Algorithm 1 (with  $\epsilon = 1$ ) applied to  $\mathbf{f}(\mathbf{P}\mathbf{x}) = \|\mathbf{P}\mathbf{x}\|_p^p + \mu\|\mathbf{P}\mathbf{x}\|_2^2$ . Now, Algorithm 2 with starting solution  $\mathbf{x}^{(0)} = \bar{\mathbf{x}}$ , applied to  $\mathbf{f}$  finds  $\tilde{\mathbf{x}}$  such that  $\mathbf{A}\tilde{\mathbf{x}} = \mathbf{b}$  and  $\mathbf{f}(\mathbf{P}\tilde{\mathbf{x}}) \leq \mathbf{f}(\mathbf{P}\mathbf{x}^*) + \delta$  in at most  $O\left(p^2\mu^{-1/(p-2)}m^{1/3}R\log\left(\frac{pmR}{\mu\delta}\right)\right)$  calls to a linear system solver.

*Proof.* From Lemma 3.3 we get  $\bar{\mathbf{x}}$  such that  $\|\bar{\mathbf{x}}\|_\infty \leq RM\|\mathbf{w}^{(T,K)}\|_\infty$ . We now want to bound  $\mathbf{f}(\bar{\mathbf{x}})$ .

$$\mathbf{f}(\bar{\mathbf{x}}) = (RM)^p\|\mathbf{w}^{(T,K)}\|_p^p + \mu(RM)^2\|\mathbf{w}^{(T,K)}\|_2^2.$$

We next note that for  $\mathbf{w}^{(T,K)} \geq \mathbf{w}_0 = 1$ ,

$$\Phi(\mathbf{w}^{(T,K)}) = p(p-1)\|\mathbf{w}^{(T,K)}\|_{p-2}^{p-2} + 2\mu \leq \Phi(\mathbf{w}_0)e^{O(1)}.$$

This implies that  $\mathbf{w}^{(T,K)} \leq O(1)\mathbf{w}_0$  and  $\|\mathbf{w}^{(T,K)}\|_\infty \leq O(1)$ . Therefore,

$$\mathbf{f}(\bar{\mathbf{x}}) \leq ((O(1)RM)^p m).$$

Now, using this bound on  $\mathbf{f}(\bar{\mathbf{x}})$  and  $\bar{\mathbf{x}}$  as a starting solution for Algorithm 2, we get our result by applying Theorem 4.6  $\square$

### B.4.1 Logistic Regression

**Theorem 5.5.** For  $\delta > 0$ , let  $\bar{\mathbf{x}}$  be the solution returned by Algorithm 1 (with  $\epsilon = 1$ ) applied to  $\mathbf{f}(\mathbf{P}\mathbf{x}) = \sum_i \log(1 + e^{(\mathbf{P}\mathbf{x})_i})$ . Now, Algorithm 2 with starting solution  $\mathbf{x}^{(0)} = \bar{\mathbf{x}}$ , applied to  $\mathbf{f}$  finds  $\tilde{\mathbf{x}}$  such that  $\mathbf{A}\tilde{\mathbf{x}} = \mathbf{b}$  and  $\sum_i \log(1 + e^{(\mathbf{P}\tilde{\mathbf{x}})_i}) \leq \sum_i \log(1 + e^{(\mathbf{P}\mathbf{x}^*)_i}) + \delta$  in at most  $O\left(m^{1/3}R\log\left(\frac{mR}{\delta}\right)\right)$  calls to a linear system solver.

*Proof.* From Lemma 3.3 we get  $\bar{\mathbf{x}}$  such that  $\|\bar{\mathbf{x}}\|_\infty \leq RM\|\mathbf{w}^{(T,K)}\|_\infty$ . We now want to bound  $\mathbf{f}(\bar{\mathbf{x}})$ .

$$\mathbf{f}(\bar{\mathbf{x}}) = \sum_i \log(1 + e^{RM\mathbf{w}_i^{(T,K)}}) \leq 2RM \sum_i \mathbf{w}_i^{(T,K)}.$$

We next note that for  $\mathbf{w}^{(T,K)} \geq \mathbf{w}_0$ ,

$$\Phi(\mathbf{w}^{(T,K)}) = \sum_i \frac{e^{\mathbf{w}_i^{(T,K)}}}{(1 + e^{\mathbf{w}_i^{(T,K)}})^2} \geq \Phi(\mathbf{w}_0)e^{-O(1)}.$$

This implies that  $\mathbf{w}^{(T,K)} \leq O(1)\mathbf{w}_0$ . Therefore,

$$\mathbf{f}(\bar{\mathbf{x}}) \leq O(Rm).$$

Now, using this bound on  $\mathbf{f}(\bar{\mathbf{x}})$  and  $\bar{\mathbf{x}}$  as a starting solution for Algorithm 2, we get our result by applying Theorem 4.6  $\square$

## C Energy Lemma

**Lemma C.1.** Let  $\tilde{\Delta} = \arg \min_{\mathbf{A}\mathbf{x}=\mathbf{c}} \mathbf{x}^\top \mathbf{P}^\top \mathbf{R}\mathbf{P}\mathbf{x}$ . Then one has for any  $\mathbf{r}$  and  $\mathbf{r}'$  such that  $\mathbf{r}' \leq \mathbf{r}$ ,

$$\Psi(\mathbf{r}') \leq \Psi(\mathbf{r}) - \frac{1}{2} \sum_i \left(1 - \frac{\mathbf{r}'_i}{\mathbf{r}_i}\right) \mathbf{r}_i (\mathbf{P}\tilde{\Delta})_i.$$

*Proof.*

$$\Psi(\mathbf{r}) = \min_{\mathbf{A}\mathbf{x}=\mathbf{c}} \mathbf{x}^\top \mathbf{P}^\top \mathbf{R}\mathbf{P}\mathbf{x}.$$

Constructing the Lagrangian and noting that strong duality holds,

$$\begin{aligned}\Psi(\mathbf{r}) &= \min_x \max_y \quad \mathbf{x}^\top \mathbf{P}^\top \mathbf{R} \mathbf{P} \mathbf{x} + 2\mathbf{y}^\top (\mathbf{c} - \mathbf{A} \mathbf{x}) \\ &= \max_y \min_x \quad \mathbf{x}^\top \mathbf{P}^\top \mathbf{R} \mathbf{P} \mathbf{x} + 2\mathbf{y}^\top (\mathbf{c} - \mathbf{A} \mathbf{x}).\end{aligned}$$

Optimality conditions with respect to  $\mathbf{x}$  give us,

$$2\mathbf{P}^\top \mathbf{R} \mathbf{P} \mathbf{x}^* = 2\mathbf{A}^\top \mathbf{y}.$$

Substituting this in  $\Psi$  gives us,

$$\Psi(\mathbf{r}) = \max_y \quad 2\mathbf{y}^\top \mathbf{c} - \mathbf{y}^\top \mathbf{A} \left( \mathbf{P}^\top \mathbf{R} \mathbf{P} \right)^{-1} \mathbf{A}^\top \mathbf{y}.$$

Optimality conditions with respect to  $\mathbf{y}$  now give us,

$$2\mathbf{c} = 2\mathbf{A} \left( \mathbf{P}^\top \mathbf{R} \mathbf{P} \right)^{-1} \mathbf{A}^\top \mathbf{y}^*,$$

which upon re-substitution gives,

$$\Psi(\mathbf{r}) = \mathbf{c}^\top \left( \mathbf{A} \left( \mathbf{P}^\top \mathbf{R} \mathbf{P} \right)^{-1} \mathbf{A}^\top \right)^{-1} \mathbf{c}.$$

We also note that

$$\mathbf{x}^* = \left( \mathbf{P}^\top \mathbf{R} \mathbf{P} \right)^{-1} \mathbf{A}^\top \left( \mathbf{A} \left( \mathbf{P}^\top \mathbf{R} \mathbf{P} \right)^{-1} \mathbf{A}^\top \right)^{-1} \mathbf{c}. \quad (5)$$

We now want to see what happens when we change  $\mathbf{r}$ . Let  $\mathbf{R}$  denote the diagonal matrix with entries  $\mathbf{r}$  and let  $\mathbf{R}' = \mathbf{R} - \mathbf{S}$ , where  $\mathbf{S}$  is the diagonal matrix with the changes in the resistances. We will use the following version of the Sherman-Morrison-Woodbury formula multiple times,

$$\left( \mathbf{X} + \mathbf{U} \mathbf{C} \mathbf{V} \right)^{-1} = \mathbf{X}^{-1} - \mathbf{X}^{-1} \mathbf{U} \left( \mathbf{C}^{-1} + \mathbf{V} \mathbf{X}^{-1} \mathbf{U} \right)^{-1} \mathbf{V} \mathbf{X}^{-1}.$$

We begin by applying the above formula for  $\mathbf{X} = \mathbf{P}^\top \mathbf{R} \mathbf{P}$ ,  $\mathbf{C} = -\mathbf{I}$ ,  $\mathbf{U} = \mathbf{P}^\top \mathbf{S}^{1/2}$  and  $\mathbf{V} = \mathbf{S}^{1/2} \mathbf{P}$ . We thus get,

$$\begin{aligned}\left( \mathbf{P}^\top \mathbf{R}' \mathbf{P} \right)^{-1} &= \left( \mathbf{P}^\top \mathbf{R} \mathbf{P} \right)^{-1} + \left( \mathbf{P}^\top \mathbf{R} \mathbf{P} \right)^{-1} \mathbf{P}^\top \mathbf{S}^{1/2} \\ &\quad \left( \mathbf{I} - \mathbf{S}^{1/2} \mathbf{P} \left( \mathbf{P}^\top \mathbf{R} \mathbf{P} \right)^{-1} \mathbf{P}^\top \mathbf{S}^{1/2} \right)^{-1} \mathbf{S}^{1/2} \mathbf{P} \left( \mathbf{P}^\top \mathbf{R} \mathbf{P} \right)^{-1}.\end{aligned} \quad (6)$$

We next observe that,

$$\mathbf{I} - \mathbf{S}^{1/2} \mathbf{P} \left( \mathbf{P}^\top \mathbf{R} \mathbf{P} \right)^{-1} \mathbf{P}^\top \mathbf{S}^{1/2} \preceq \mathbf{I},$$

which gives us,

$$\left( \mathbf{P}^\top \mathbf{R}' \mathbf{P} \right)^{-1} \succeq \left( \mathbf{P}^\top \mathbf{R} \mathbf{P} \right)^{-1} + \left( \mathbf{P}^\top \mathbf{R} \mathbf{P} \right)^{-1} \mathbf{P}^\top \mathbf{S} \mathbf{P} \left( \mathbf{P}^\top \mathbf{R} \mathbf{P} \right)^{-1}. \quad (7)$$

This further implies,

$$\mathbf{A} \left( \mathbf{P}^\top \mathbf{R}' \mathbf{P} \right)^{-1} \mathbf{A}^\top \succeq \mathbf{A} \left( \mathbf{P}^\top \mathbf{R} \mathbf{P} \right)^{-1} \mathbf{A}^\top + \mathbf{A} \left( \mathbf{P}^\top \mathbf{R} \mathbf{P} \right)^{-1} \mathbf{P}^\top \mathbf{S} \mathbf{P} \left( \mathbf{P}^\top \mathbf{R} \mathbf{P} \right)^{-1} \mathbf{A}^\top. \quad (8)$$

We apply the Sherman-Morrison formula again for,  $\mathbf{X} = \mathbf{A} \left( \mathbf{P}^\top \mathbf{R} \mathbf{P} \right)^{-1} \mathbf{A}^\top$ ,  $\mathbf{C} = \mathbf{I}$ ,  $\mathbf{U} = \mathbf{A} \left( \mathbf{P}^\top \mathbf{R} \mathbf{P} \right)^{-1} \mathbf{P}^\top \mathbf{S}^{1/2}$  and  $\mathbf{V} = \mathbf{S}^{1/2} \mathbf{P} \left( \mathbf{P}^\top \mathbf{R} \mathbf{P} \right)^{-1} \mathbf{A}^\top$ . Let us look at the term  $\mathbf{C}^{-1} + \mathbf{V} \mathbf{X}^{-1} \mathbf{U}$ .

$$\begin{aligned}\mathbf{C}^{-1} + \mathbf{V} \mathbf{X}^{-1} \mathbf{U} &= \mathbf{I} + \mathbf{S}^{1/2} \mathbf{P} \left( \mathbf{P}^\top \mathbf{R} \mathbf{P} \right)^{-1} \mathbf{A}^\top \left( \mathbf{A} \left( \mathbf{P}^\top \mathbf{R} \mathbf{P} \right)^{-1} \mathbf{A}^\top \right)^{-1} \mathbf{A} \left( \mathbf{P}^\top \mathbf{R} \mathbf{P} \right)^{-1} \mathbf{P}^\top \mathbf{S}^{1/2} \\ &\preceq \mathbf{I} + \mathbf{S}^{1/2} \mathbf{P} \left( \mathbf{P}^\top \mathbf{R} \mathbf{P} \right)^{-1} \mathbf{P}^\top \mathbf{S}^{1/2} \\ &\preceq \mathbf{I} + \mathbf{S}^{1/2} \mathbf{R}^{-1} \mathbf{S}^{1/2}.\end{aligned}$$

Using this, we get,

$$\left( A \left( P^\top R' P \right)^{-1} A^\top \right)^{-1} \preceq X^{-1} - X^{-1} U \left( I + S^{1/2} R^{-1} S^{1/2} \right)^{-1} V X^{-1},$$

which on multiplying by  $c^\top$  and  $c$  gives,

$$\Psi(r') \leq \Psi(r) - c^\top X^{-1} U \left( I + S^{1/2} R^{-1} S^{1/2} \right)^{-1} V X^{-1} c.$$

We note from Equation (5) that  $x^* = \left( P^\top R P \right)^{-1} A^\top X^{-1} c$ . We thus have,

$$\begin{aligned} \Psi(r') &\leq \Psi(r) - (x^*)^\top P^\top S^{1/2} \left( I + S^{1/2} R^{-1} S^{1/2} \right)^{-1} S^{1/2} P x^* \\ &= \Psi(r) - \sum_e (r_e - r'_e) \left( 1 + \frac{r_e - r'_e}{r_e} \right)^{-1} (P x^*)_e \\ &= \Psi(r) - \sum_e \left( \frac{r_e - r'_e}{2r_e - r'_e} \right) r_e (P x^*)_e \\ &\leq \Psi(r) - \frac{1}{2} \sum_e \left( \frac{r_e - r'_e}{r_e} \right) r_e (P x^*)_e \end{aligned}$$

Where the last line follows from the fact  $2r_e - r'_e \leq 2r_e$ .  $\square$

The next lemma is Lemma C.4 in [ABKS21] which is included here for completeness.

**Lemma C.2.** Let  $\tilde{\Delta} = \arg \min_{Ax=c} x^\top P^\top R P x$ . Then one has for any  $r'$  and  $r$  such that  $r' \geq r$ ,

$$\Psi(r') \geq \Psi(r) + \sum_e \left( 1 - \frac{r_e}{r'_e} \right) r_e (P \tilde{\Delta})_e^2.$$

*Proof.*

$$\Psi(r) = \min_{Ax=c} x^\top P^\top R P x.$$

Constructing the Lagrangian and noting that strong duality holds,

$$\begin{aligned} \Psi(r) &= \min_x \max_y x^\top P^\top R P x + 2y^\top (c - Ax) \\ &= \max_y \min_x x^\top P^\top R P x + 2y^\top (c - Ax). \end{aligned}$$

Optimality conditions with respect to  $x$  give us,

$$2P^\top R P x^* = 2A^\top y.$$

Substituting this in  $\Psi$  gives us,

$$\Psi(r) = \max_y 2y^\top c - y^\top A \left( P^\top R P \right)^{-1} A^\top y.$$

Optimality conditions with respect to  $y$  now give us,

$$2c = 2A \left( P^\top R P \right)^{-1} A^\top y^*,$$

which upon re-substitution gives,

$$\Psi(r) = c^\top \left( A \left( P^\top R P \right)^{-1} A^\top \right)^{-1} c.$$

We also note that

$$x^* = \left( P^\top R P \right)^{-1} A^\top \left( A \left( P^\top R P \right)^{-1} A^\top \right)^{-1} c. \quad (9)$$

We now want to see what happens when we change  $r$ . Let  $R$  denote the diagonal matrix with entries  $r$  and let  $R' = R + S$ , where  $S$  is the diagonal matrix with the changes in the resistances. We will use the following version of the Sherman-Morrison-Woodbury formula multiple times,

$$(X + UCV)^{-1} = X^{-1} - X^{-1}U(C^{-1} + VX^{-1}U)^{-1}VX^{-1}.$$

We begin by applying the above formula for  $X = P^\top RP$ ,  $C = I$ ,  $U = P^\top S^{1/2}$  and  $V = S^{1/2}P$ . We thus get,

$$\begin{aligned} (P^\top R'P)^{-1} &= (P^\top RP)^{-1} - (P^\top RP)^{-1}P^\top S^{1/2} \\ &\quad \left( I + S^{1/2}P(P^\top RP)^{-1}P^\top S^{1/2} \right)^{-1} S^{1/2}P(P^\top RP)^{-1}. \end{aligned} \quad (10)$$

We next claim that

$$I + S^{1/2}P(P^\top RP)^{-1}P^\top S^{1/2} \preceq I + S^{1/2}R^{-1}S^{1/2},$$

which gives us,

$$\begin{aligned} (P^\top R'P)^{-1} &\preceq (P^\top RP)^{-1} - \\ &\quad (P^\top RP)^{-1}P^\top S^{1/2}(I + S^{1/2}R^{-1}S^{1/2})^{-1}S^{1/2}P(P^\top RP)^{-1}. \end{aligned} \quad (11)$$

This further implies,

$$\begin{aligned} A(P^\top R'P)^{-1}A^\top &\preceq A(P^\top RP)^{-1}A^\top - \\ &\quad A(P^\top RP)^{-1}P^\top S^{1/2}(I + S^{1/2}R^{-1}S^{1/2})^{-1}S^{1/2}P(P^\top RP)^{-1}A^\top. \end{aligned} \quad (12)$$

We apply the Sherman-Morrison formula again for,  $X = A(P^\top RP)^{-1}A^\top$ ,  $C = -(I + S^{1/2}R^{-1}S^{1/2})^{-1}$ ,  $U = A(P^\top RP)^{-1}P^\top S^{1/2}$  and  $V = S^{1/2}P(P^\top RP)^{-1}A^\top$ . Let us look at the term  $C^{-1} + VX^{-1}U$ .

$$-(C^{-1} + VX^{-1}U)^{-1} = (I + S^{1/2}R^{-1}S^{1/2} - VX^{-1}U)^{-1} \succeq (I + S^{1/2}R^{-1}S^{1/2})^{-1}.$$

Using this, we get,

$$\left( A(P^\top R'P)^{-1}A^\top \right)^{-1} \succeq X^{-1} + X^{-1}U(I + S^{1/2}R^{-1}S^{1/2})^{-1}VX^{-1},$$

which on multiplying by  $c^\top$  and  $c$  gives,

$$\Psi(r') \geq \Psi(r) + c^\top X^{-1}U(I + S^{1/2}R^{-1}S^{1/2})^{-1}VX^{-1}c.$$

We note from Equation (9) that  $x^* = (P^\top RP)^{-1}A^\top X^{-1}c$ . We thus have,

$$\begin{aligned} \Psi(r') &\geq \Psi(r) + (x^*)^\top P^\top S^{1/2}(I + S^{1/2}R^{-1}S^{1/2})^{-1}S^{1/2}Px^* \\ &= \Psi(r) + \sum_e \left( \frac{r'_e - r_e}{r'_e} \right) r_e (Px^*)_e. \end{aligned}$$

□
